# Supplementary material for: Three-dimensional hyperbranched TiO2/ZnO heterostructured arrays for efficient quantum dot-sensitized solar cells
Source: Royal Society of Chemistry journal article supplement (doi:10.1039/c5ta02269j), 2015-01-01
Supplement: c5ta02269j1.pdf [file c5ta02269j1.pdf]

## Electronic Supplementary Information

### **Three-dimensional hyperbranched TiO<sub>2</sub>/ZnO heterostructured arrays for efficient quantum dot-sensitized solar cells**

Hao-Lin Feng, Wu-Qiang Wu, Hua-Shang Rao, Long-Bin Li, Dai-Bin Kuang\*  
and Cheng-Yong Su

MOE Key Laboratory of Bioinorganic and Synthetic Chemistry, Lehn Institute of Functional Materials, School of Chemistry and Chemical Engineering, Sun Yat-sen University, Guangzhou 510275, P. R. China.

Fax: (+86) 20-8411 3015.

E-mail: [kuangdb@mail.sysu.edu.cn](mailto:kuangdb@mail.sysu.edu.cn) (D. B. Kuang)

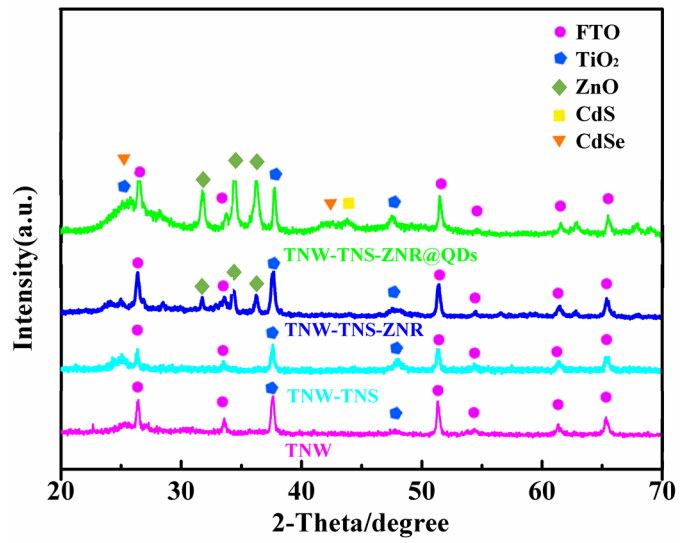

**Figure S1** XRD patterns of TNW, TNW-TNS, TNW-TNS-ZNR and TNW-TNS-ZNR@QDs on FTO glass substrate.

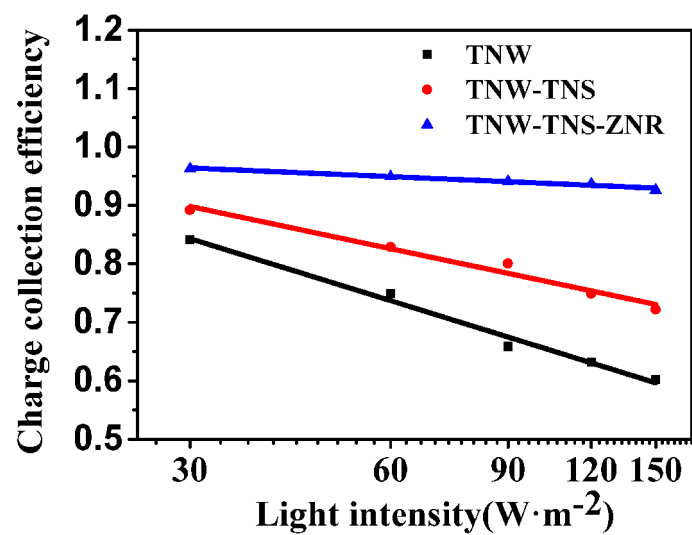

**Figure S2** The charge-collection efficiency of QDSSCs based on TNW, TNW-TNS and TNW-TNS-ZNR arrays photoanodes.

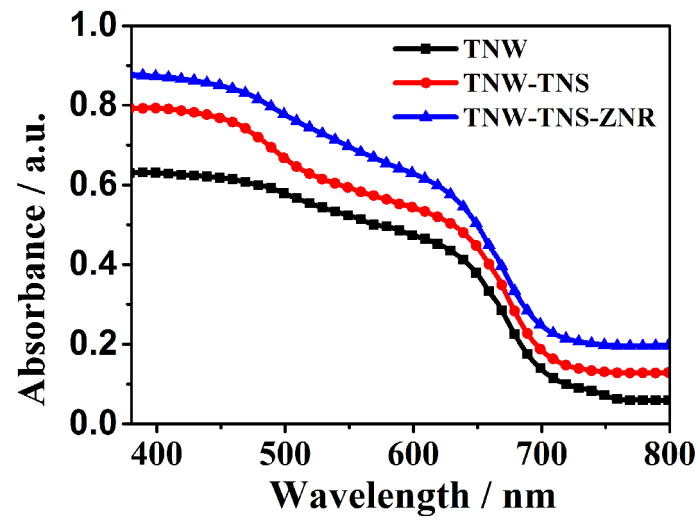

**Figure S3** UV-vis absorption spectra of CdS/CdSe sensitized photoanodes based on TNW, TNW-TNS, TNW-TNS-ZNR arrays.

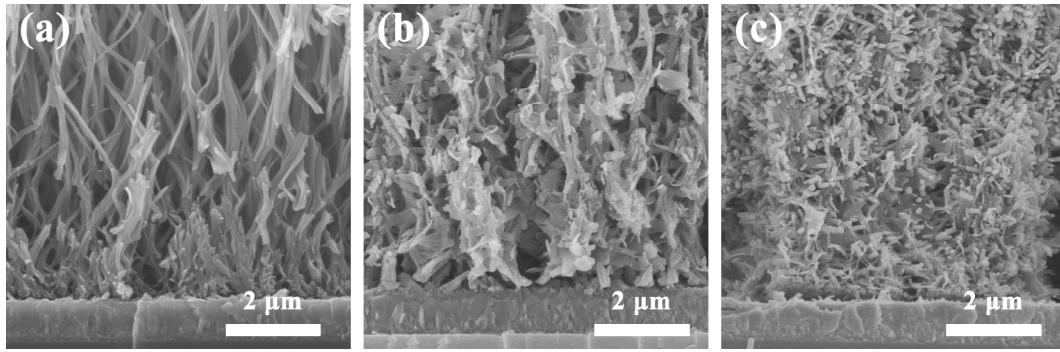

**Figure S4** Zoom-in SEM images showing the connection features between the roots of (a) TNW, (b) TNW-TNS and (c) TNW-TNS-ZNR (c) arrays and FTO glass substrate.

**Table S1** Detailed values of Resistance ( $R$ ) and electron lifetime value ( $\tau_r$ ) from EIS spectra simulated by equivalent circuit as shown in Figure 4a.

| <b>QDSSCs</b> | <b><math>R_s</math></b> | <b><math>R_2</math> (ohm)</b> | <b><math>\tau_r</math> (s)</b> |
|---------------|-------------------------|-------------------------------|--------------------------------|
| TNW           | 12.85                   | 52.11                         | 0.066                          |
| TNW-TNS       | 12.82                   | 94.13                         | 0.088                          |
| TNW-TNS-ZNR   | 12.01                   | 103.9                         | 0.096                          |

**Table S2** Detailed photovoltaic parameters of QDSSCs based on different arrays photoanodes and counter electrodes.

| <b>QDSSCs</b>                      | <b><math>J_{SC}</math> mA·cm<sup>-2</sup></b> | <b><math>V_{OC}</math> mV</b> | <b><math>\eta</math> %</b> | <b><math>FF</math></b> |
|------------------------------------|-----------------------------------------------|-------------------------------|----------------------------|------------------------|
| TNW                                | 12.98                                         | 477                           | 2.85                       | 0.46                   |
| TNW-TNS                            | 14.71                                         | 489                           | 3.75                       | 0.52                   |
| TNW-TNS-ZNR                        | 15.95                                         | 505                           | 4.25                       | 0.53                   |
| TNW-TNS-ZNR with Cu <sub>2</sub> S | 19.19                                         | 517                           | 5.38                       | 0.54                   |
